# Supplementary material
Source: PubMed Central journal article supplement (PMC2583793)
Supplement: NIHMS55355-supplement-Supp.pdf [file NIHMS55355-supplement-Supp.pdf]

## Supporting material to “Some Step-down Procedures Controlling the False Discovery Rate under Dependence”

Yongchao Ge and Stuart C. Sealfon and Terence P. Speed

Algorithm S1 presents the detailed computations for the step-down procedure of Section 4.2 of the main text. In Algorithm S1, the  $p$ -value  $p_i$  before Step 1 and the  $p$ -values  $p_{i,b}$  in Step 2 are computed based on the the null distribution of  $T_i$ . This null distribution can be an appropriate Student  $t$  distribution when the data are normally distributed or can be computed by further resamplings.

**Algorithm S1** Resampling algorithm for computing FDR adjusted  $p$ -values

Compute statistic  $t_i$ , and the  $p$ -value  $p_i = P(|T_i| \geq |t_i| \mid H_i)$ ,  $i = 1, \dots, m$  for the observed data  $\mathbf{x}$ . Without loss of generality, label the  $p$ -values  $p_1 \leq \dots \leq p_m$ .

For the  $b$ -th step,  $b = 1, \dots, B$ , proceed as follows.

1. Compute the resampled data matrix  $\mathbf{x}^b$ , for example by randomly permuting the columns of matrix  $\mathbf{x}$ .
2. Compute the  $t$ -statistics  $t_{1,b}, \dots, t_{m,b}$  for each hypothesis on the resampled data  $\mathbf{x}^b$  and then the  $p$ -values  $p_{i,b} = P(|T_i| \geq |t_{i,b}| \mid H_i)$ .
3. For each  $i = 1, \dots, m$ , mimic the step-down procedure:
  - (a) for  $j = 1, \dots, m - i + 1$ , let  $p_{(j)}^{i,b}$  be the  $j$ -th smallest member of  $\{p_{i,b}, \dots, p_{m,b}\}$ ;
  - (b) define  $R_{i,b}$  to be the unique integer  $k$  such that

$$p_{(1)}^{i,b} \leq p_i, \dots, p_{(k)}^{i,b} \leq p_{i+k-1} \text{ and } p_{(k+1)}^{i,b} > p_{i+k}.$$

4. Compute  $f_{1,b} = I(R_{1,b} > 0)$  and, for  $i = 2, \dots, m$ , compute  $f_{i,b} = R_{i,b}/(R_{i,b} + i - 1)$ .

Steps 1-4 are carried out  $B$  times and the adjusted  $p$ -values are estimated by  $\check{p}_i = \sum_{b=1}^B f_{i,b}/B$ , with monotonicity enforced by setting

$$\tilde{p}_1 \leftarrow \check{p}_1, \quad \tilde{p}_i \leftarrow \max(\tilde{p}_{i-1}, \check{p}_i) \quad \text{for } i = 2, \dots, m.$$

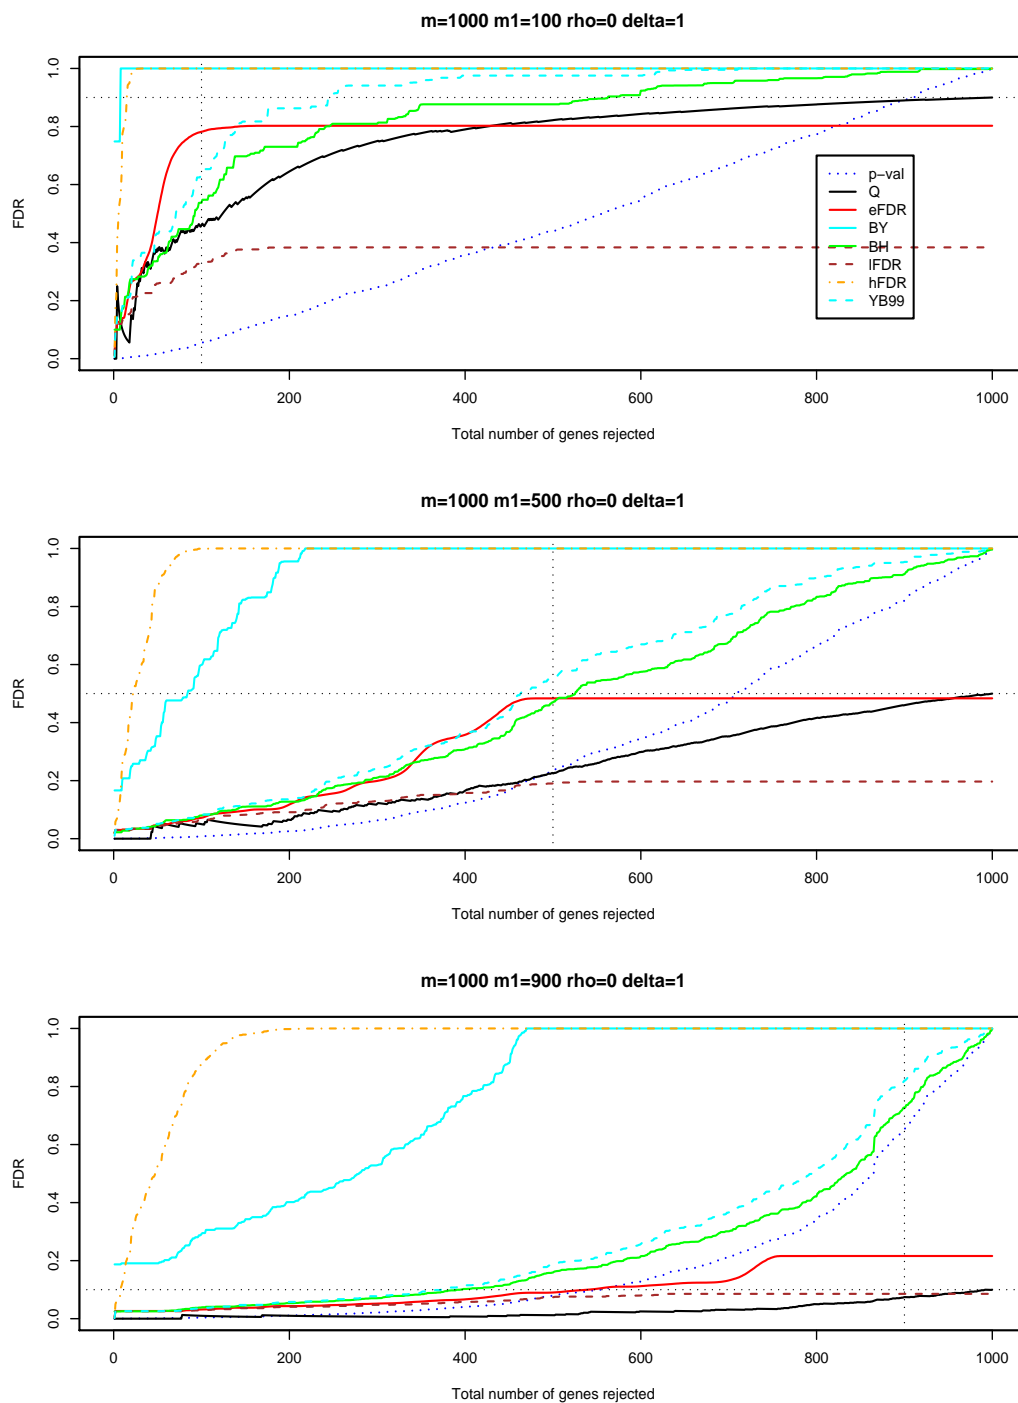

Figure S1: Different FDR procedures. The independent case:  $\rho = 0$  and  $\delta = 1$ : the dotted vertical line is  $x = m_1$ ; the dotted horizontal line is  $y = m_0/m$ , the overall proportion of false null hypotheses. Different panels are for different values of  $m_1$  (100, 500, 900).

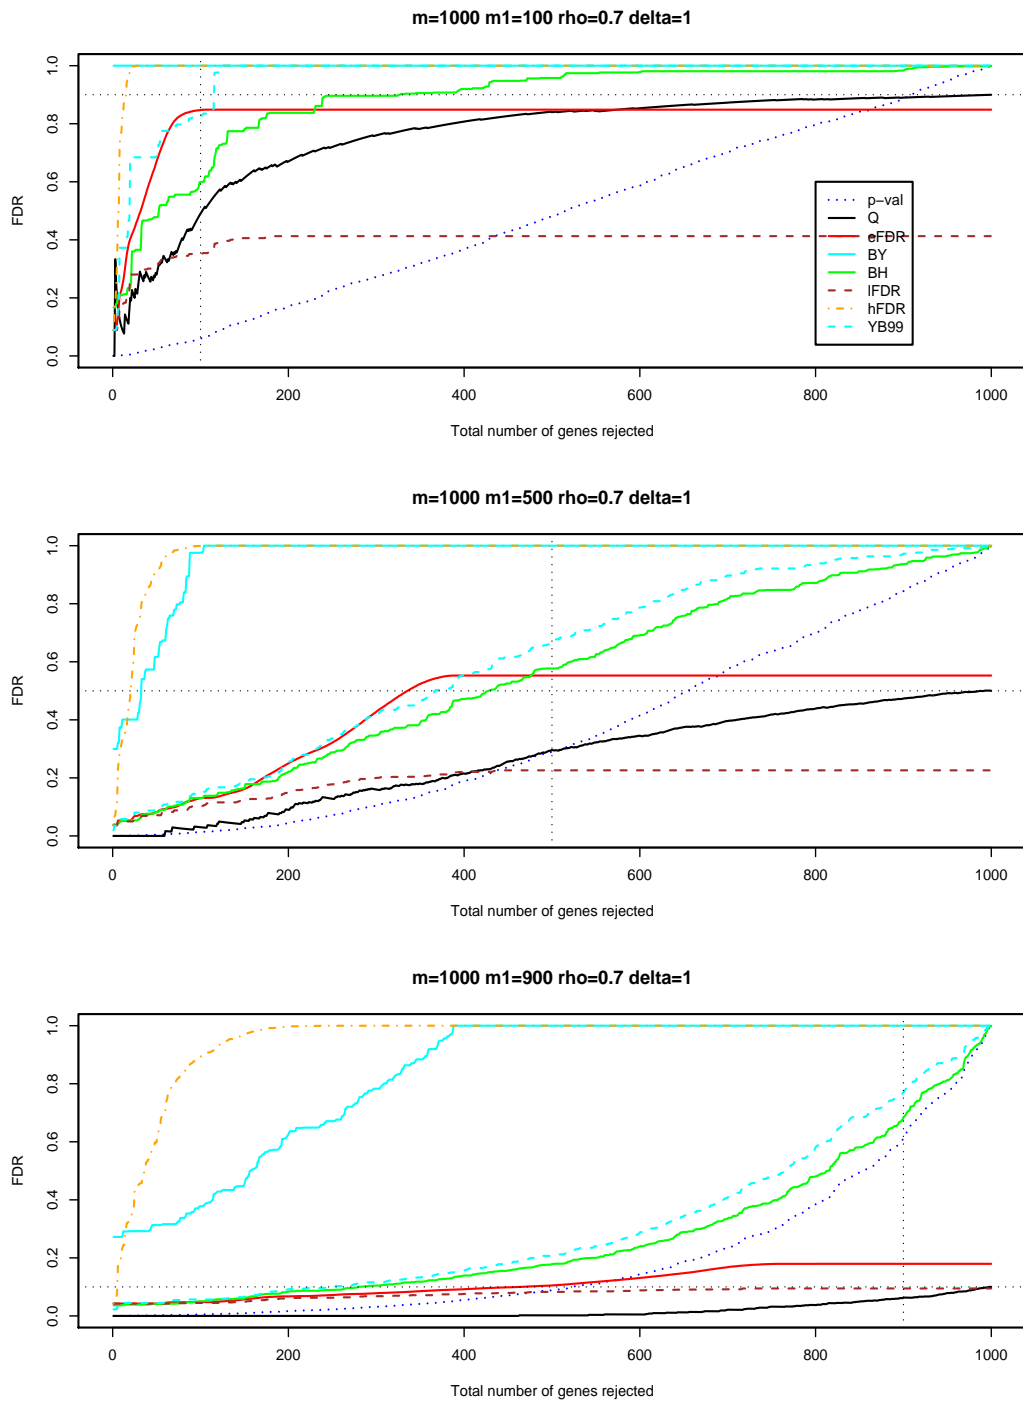

Figure S2: The positively dependent case  $\rho = 0.7$  and  $\delta = 1$ : different FDR procedures and different values of  $m_1$  (100, 500, 900).

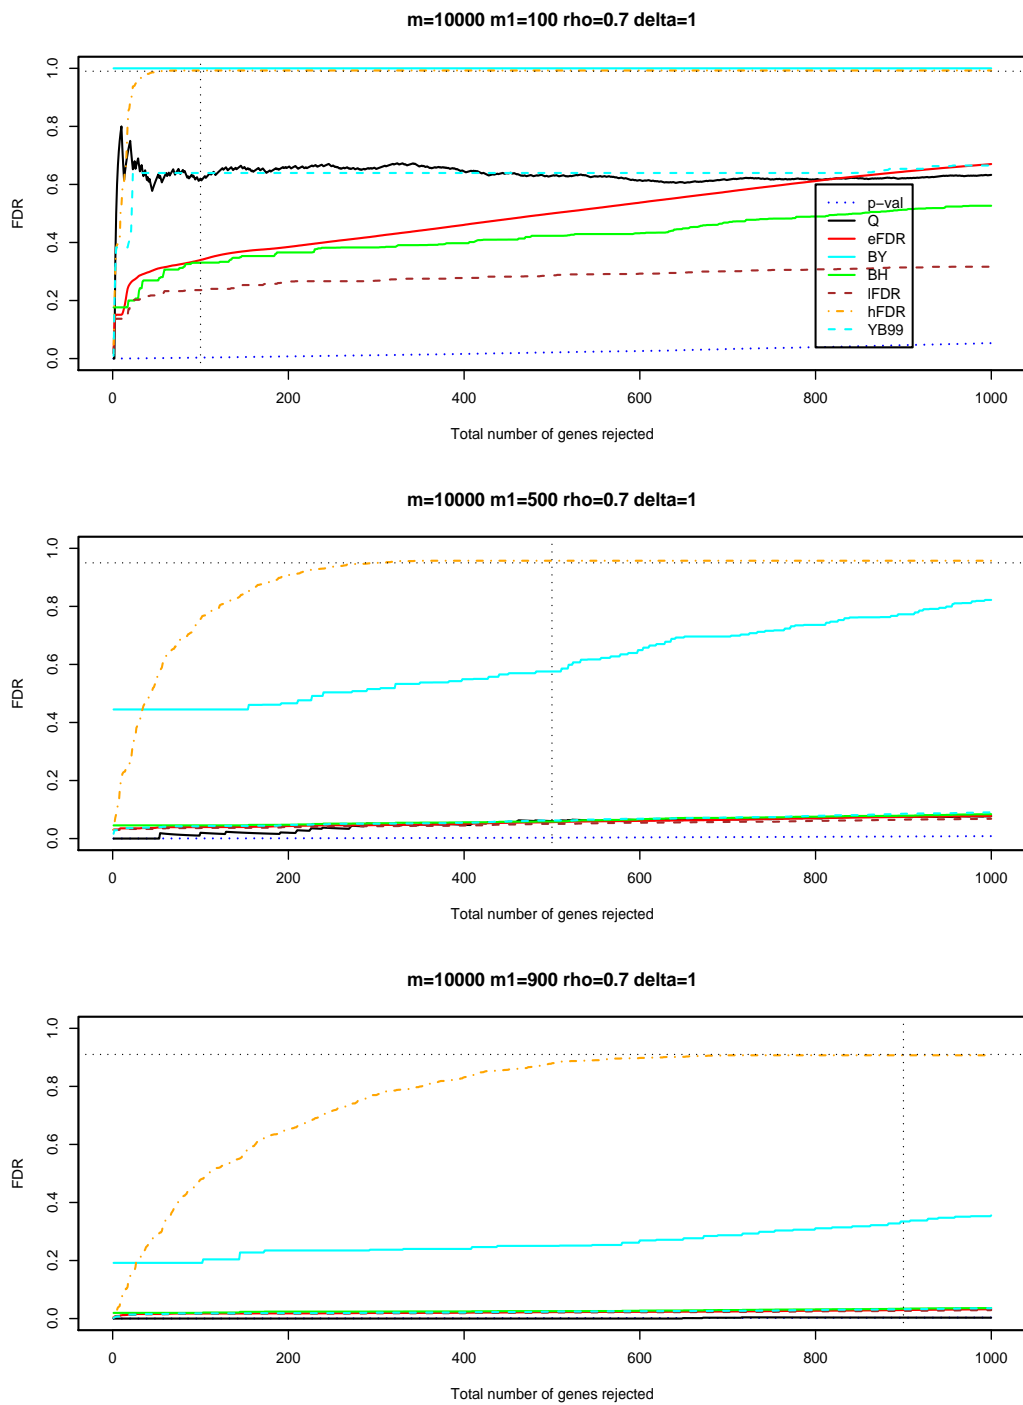

Figure S3: The same setup as in Figure S2 except that total number  $m$  of genes has increased from 1,000 to 10,000. We only plot the total number of genes rejected up to 1,000 among 10,000 genes.
